# Supplementary material for: Structural transition upon hydrogenation of B20 at different charge states: from tubular to disk-like, and to cage-like
Source: Royal Society of Chemistry journal article supplement (doi:10.1039/c5cp07731a), 2016-01-01

## SUPPORTING INFORMATION

### Structural Transition Upon Hydrogenation of B<sub>20</sub> at Different Charge States: From Tubular, Disk-, to Cage-Like

Bing Bai, Hui Bai,\*

*Key Laboratory of Coal Science and Technology of Ministry of Education and Shanxi Province,  
Taiyuan University of Technology, Taiyuan 030024, Shanxi, China*

\*E-mail: baihui@tyut.edu.cn

**Figure S1.** The AdNDP bonding patterns of the second low-lying isomer B<sub>20</sub>H<sub>4</sub> (**7.1**) (**a**) and the third low-lying isomer B<sub>20</sub>H<sub>4</sub> (**7.2**) (**b**).

**Figure S2.** Optimized geometries of cage-like B<sub>20</sub>H<sub>6</sub> and quasi-planar B<sub>20</sub>H<sub>6</sub> at the B3LYP, with their symmetries, electronic states, and relative energies indicated in kcal mol<sup>-1</sup> at CCSD(T) and B3LYP (in parentheses), respectively.

**Figure S1.** The AdNDP bonding patterns of the second low-lying isomer  $B_{20}H_4$  (**7.1**) (a) and the third low-lying isomer  $B_{20}H_4$  (**7.2**) (b).

a.

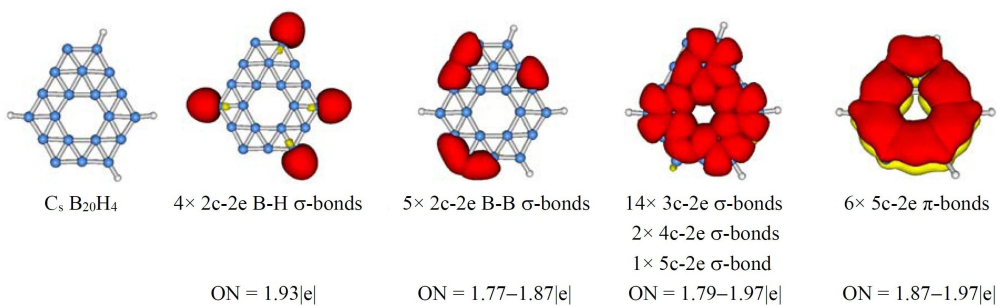

b.

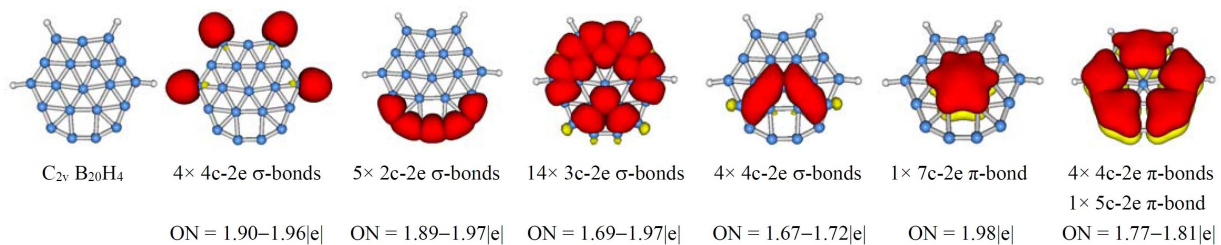

**Figure S2.** Optimized geometries of cage-like  $B_{20}H_6$  and quasi-planar  $B_{20}H_6$  at the B3LYP, with their symmetries, electronic states, and relative energies indicated in kcal mol<sup>-1</sup> at CCSD(T) and B3LYP (in parentheses), respectively.

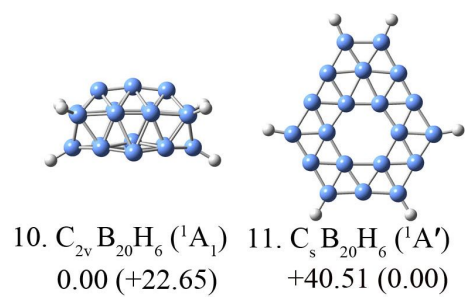

Supplement: c5cp07731a1.pdf [file c5cp07731a1.pdf]
